# Supplementary material for: Quality of Life Ratings and Proxy Bias in Primary Progressive Aphasia: Two Sides to the Story?
Source: PubMed Central journal article supplement — Am J Alzheimers Dis Other Demen. 2023 May 29;38:15333175231177668. doi: 10.1177/15333175231177668 (PMC10623902; doi:10.1177/15333175231177668), 2023-05-29
Supplement: sj-pdf-1-aja-10.1177_15333175231177668.pdf [file sj-pdf-1-aja-10.1177_15333175231177668.pdf]

| Study                    | Population (as described by author)*                 | Description of severity or recruitment criteria | Proxy type                                                                               | N dyads | QOL instrument        | Proxy Effect examined using**                           | Rater agreement                                                     |
|--------------------------|------------------------------------------------------|-------------------------------------------------|------------------------------------------------------------------------------------------|---------|-----------------------|---------------------------------------------------------|---------------------------------------------------------------------|
| Arlt et al. (2008)       | Dementia                                             | "Mild to Moderate" MMSE $\geq 11$               | Family caregivers                                                                        | 100     | SF-12 HS, EUROHIS QOL | Group comparison                                        | Weak Pearson's correlation                                          |
| Arons et al. (2013)      | Dementia                                             | "Very mild to moderate"                         | Informal caregivers                                                                      | 175     | EQ-5D, QOL-AD         | Descriptive statistics                                  | Poor-moderate ICC over multiple timepoints                          |
| Bruvik et al. (2012)     | Dementia                                             | MMSE $\geq 15$                                  | Family caregivers                                                                        | 230     | QOL-AD                | Group comparison <sup>a</sup>                           | NA                                                                  |
| Huang et al. (2008)      | Dementia                                             |                                                 | Family caregivers                                                                        | 120     | QOL-AD                | Group comparison                                        | Low Cronbach's Alpha for whole group and across severity subgroups  |
| Jacob et al. (2017)      | Dementia                                             |                                                 | Family caregivers                                                                        | 718     | QOL-AD                | Group comparison                                        | NA                                                                  |
| Römhild et al. (2018)    | Dementia (64.2% community dwelling, $\geq 65$ years) | MMSE $\leq 24$                                  | Family vs paid carers, dependent on setting. Of the family ones (adult children (45.1%)) | 1330    | QOL-AD                | T-test <sup>a</sup>                                     | Poor agreement as per Bland-Altman plot Limits of Agreement.        |
| Wu et al. (2020)         | Dementia (including FTLD)                            | MMSE $\geq 15$                                  | Informal caregivers                                                                      | 1283    | QOL-AD                | Descriptive statistics & Bland Altman plot <sup>b</sup> | Poor agreement as per Bland-Altman Limits of Agreement <sup>c</sup> |
| Bosboom et al. (2012)    | Alzheimer's Disease                                  | "Mild to Moderate"                              | Family caregivers (rated twice)                                                          | 80      | QOL-AD                | Group comparison                                        | <sup>d</sup>                                                        |
| Conde Sala et al. (2010) | Alzheimer's Disease                                  | MMSE 10-28                                      | Family caregivers (spouses vs children)                                                  | 251     | QOL-AD                | Group comparison & effect size <sup>a</sup>             | NA                                                                  |
| Logsdon et al. (2002)    | Alzheimer's Disease                                  | "An actively involved caregiver" <sup>e</sup>   |                                                                                          | 177     | QOL-AD                | NA                                                      | Poor ICC                                                            |
| Ready et al. (2004)      | Alzheimer's Disease or MCI                           | "Very mild to mild" Alzheimer's                 | "Reliable informant"                                                                     | 79      | DQol                  | NA                                                      | Moderate Pearson's correlation                                      |

| Vogel et al. (2006)    | Alzheimer's (age >60 years)           | "Very early Alzheimer's" MMSE $\leq 20$                                                                                                     | Family caregivers                             | 48  | QOL-AD, EQ-5D              | NA                                          | NA                                                                                          |
|------------------------|---------------------------------------|---------------------------------------------------------------------------------------------------------------------------------------------|-----------------------------------------------|-----|----------------------------|---------------------------------------------|---------------------------------------------------------------------------------------------|
| Bakker et al. (2014)   | Young Onset Dementia (including FTLD) |                                                                                                                                             | Informal caregivers                           | 152 | QOL-AD                     | Group comparison                            | NA                                                                                          |
| Cruise et al. (2005)   | Stroke Aphasia                        | Reliable Yes/No response; moderate comprehension ( $\leq 5/10$ on WAB Comp)                                                                 | Main regular contact                          | 30  | Four measures <sup>f</sup> | Global QOL rating on t-test and effect size | Moderate ICC agreement for QOL item of Dartmouth COOP and Overall score on Well-Being Scale |
| Hilari et al. (2007)   | Stroke Aphasia                        | Score $>7/15$ on the receptive subtest of Frenchay Aphasia Screening Test (FAST) which is the cut-off score for self-completion of SAQOL-39 | Significant other who saw them $\leq 2$ /week | 50  | SAQOL-39                   | T-test (small effect size & large SD)       | Excellent ICC for overall QOL                                                               |
| Ignatiou et al. (2012) | Stroke Aphasia                        |                                                                                                                                             |                                               | 23  | SAQOL-39 (Greek version)   |                                             |                                                                                             |

\*Community dwelling unless otherwise specified

\*\*Some studies had multiple participant subgroups. This column is concerned with whether a proxy effect was found between the community dwelling group with the condition (IE not in institutional care)

and their informal carer / communication partner (ie not a health professional)

a) Additional differences reported depending on subgroup of caregiver

b) Wu et al. (2020) do not report the confidence interval for the mean and therefore it was impossible to know if the line of equality was inside the confidence interval window (necessary for Bland Altman plot interpretation, see Giavarina, 2015). However, as the 1.96SD Limits of Agreement were reported, we were able to calculate the confidence interval (based on Mean=3.3, SD=6.38, n=1283 dyads) to be 95%CI=2.95-3.65. Therefore a significant bias is occurring.

- c) Our analysis as no a priori limits set by authors
- d) Bosboom et al. (2012) claimed acceptable agreement of raters based on their BA plot, however, we have omitted this finding due to our observation (also noted by Römhild et al., 2018) that the interpretation of what limits of agreement represent is incorrect.
- e) an actively involved caregiver who lived with them or spent every day with them. 80% of caregivers were spouses, 9% were adult children, and 11% were other close relatives or friends who lived with and cared for the patient
- f) Four QOL measures: A global rating designed for the study, the Short-Form-36 Health Survey (Ware & Sherbourne, 1992), Dartmouth COOP Charts (Nelson et al., 1987) and the 'How I feel about myself' wellbeing scale (Ryff, 1989). Only total or overall scores are considered in this table, rather than subscales.

Notes:

NA: refers to cases where no test has been reported

FTLD : Fronto-temporal Lobar Degeneration (Coyle Gilchrist et al., 2016)

DQol : Dementia Quality of life Instrument (Brod et al., 1999)

EUROHIS QOL : European health interview surveys quality of life index (Schmidt, 2006)

EQ-5D : A measure of health status from the EuroQol Group (Rabin & De Charro, 2001)

QOL-AD : Quality of Life in Alzheimer's Disease Scale (Logsdon et al., 1999)

SAQOL-39 : Stroke and Aphasia Quality of Life Scale (Hilari et al., 2003)

SF-12 HS : 36-Item Short Form Survey (Ware, 1996)
