# Supplementary material for: Quality of Life Ratings and Proxy Bias in Primary Progressive Aphasia: Two Sides to the Story?
Source: PubMed Central journal article supplement — Am J Alzheimers Dis Other Demen. 2023 May 29;38:15333175231177668. doi: 10.1177/15333175231177668 (PMC10623902; doi:10.1177/15333175231177668), 2023-05-29
Supplement: sj-pdf-2-aja-10.1177_15333175231177668.pdf [file sj-pdf-2-aja-10.1177_15333175231177668.pdf]

Supplement B – Participant Language and Cognitive Profiles

| Subtest                           | Max | Participants |     |      |      |      |      |     |      |      |     |      |       |       |     |      |       |      |      |
|-----------------------------------|-----|--------------|-----|------|------|------|------|-----|------|------|-----|------|-------|-------|-----|------|-------|------|------|
|                                   |     | 1            | 2   | 3    | 4    | 5    | 6    | 7   | 8    | 9    | 10  | 11   | 12    | 13    | 14  | 15   | 16    | 17   | 18   |
| <b>Expressive Language</b>        |     |              |     |      |      |      |      |     |      |      |     |      |       |       |     |      |       |      |      |
| <b>Naming</b>                     |     |              |     |      |      |      |      |     |      |      |     |      |       |       |     |      |       |      |      |
| Nouns (SydBat <sup>a</sup> )      | 30  | 29           | 28  | 18*  | 26   | 5*   | 23   | 28  | 19*  | 4*   | 27  | 18*  | 7*    | 10*   | 29  | 18*  | 23    | 7*   | 19*  |
| Actions (CAT <sup>c</sup> )       | 10  | 9            | 10  | 4**  | 9    | 2**  | 10   | 10  | 8    | 0**  | 10  | 7**  | 0**   | 4**   | 10  | 8    | 8     | 0**  | 10   |
| <b>Repetition</b>                 |     |              |     |      |      |      |      |     |      |      |     |      |       |       |     |      |       |      |      |
| Objects (SydBat)                  | 30  | 29*          | 27* | 30   | 29*  | 29*  | 26*  | 10* | 30   | 29*  | 29* | 26*  | 11*   | 26*   | 29* | 29*  | 29*   | 29*  | 28*  |
| Non-Words (CAT)                   | 10  | 6            | 8   | 10   | 10   | 8    | 10   | 8   | 10   | 10   | 6   | 9    | 10    | 8     | 10  | 8    | 10    | 10   | 8    |
| Sentences (MAE <sup>b</sup> )     | 14  | 8*           | 8*  | 7*   | 6*   | 4*   | 7*   | 9   | 7*   | 5*   | 8*  | 3*   | 0*    | 4*    | 12  | 2*   | 6*    | 9    | 8*   |
| <b>Picture Descriptions</b>       |     |              |     |      |      |      |      |     |      |      |     |      |       |       |     |      |       |      |      |
| Spoken (CAT)                      | 65+ | 46           | 42  | 28** | 27** | 15** | 30** | 36  | 33** | 14** | 53  | 30** | 9**   | 22**  | 49  | 22** | 19**  | 47   | 42   |
| Written (CAT)                     | 35+ | 16**         | 20  | NA   | 14** | 8**  | 22   | 25  | 28   | 11** | 35  | 14** | 0**   | 0**   | 24  | 4**  | 24    | 15** | 33   |
| <b>Receptive Language</b>         |     |              |     |      |      |      |      |     |      |      |     |      |       |       |     |      |       |      |      |
| <b>Single words</b>               |     |              |     |      |      |      |      |     |      |      |     |      |       |       |     |      |       |      |      |
| Word-Pic Match (SydBat)           | 30  | 30           | 29  | 24*  | 25*  | 21*  | 28   | 29  | 28   | 1*   | 30  | 30   | 25*   | 25*   | 30  | 25*  | 26*   | 14*  | 28   |
| Semantic Assoc (SydBat)           | 30  | 29           | 28  | 17*  | 26   | 22*  | 26   | 29  | 24*  | 5*   | 29  | 28   | 15*   | 24*   | 30  | 23*  | 21*   | 11*  | 29   |
| Reading (CAT)                     | 70  | 68           | 64  | 70   | 67   | 53** | 69   | 68  | 66   | 52** | 66  | NA   | 39**  | 56**  | 69  | 60   | 69    | 60   | 61   |
| <b>Sentences</b>                  |     |              |     |      |      |      |      |     |      |      |     |      |       |       |     |      |       |      |      |
| Spoken (CAT)                      | 32  | 29           | 30  | 19** | 29   | 22** | 25** | 32  | 30   | 24** | 32  | 25** | 17**  | 20**  | 32  | 25** | 23**  | 32   | 25** |
| Written (CAT)                     | 32  | 31           | 31  | 15** | 30   | 28   | 28   | 28  | 30   | 30   | 32  | 16** | 12**  | 23**  | 32  | 24   | 20**  | 32   | 27   |
| Paragraphs (CAT)                  | 4   | 4            | 4   | 3.5  | 4    | 4    | 4    | 4   | 3.5  | 4    | 4   | 4    | 2.5** | 2.5** | 4   | 4    | 2.5** | 3    | 2**  |
| <b>Cognitive Screen (ACE-III)</b> |     |              |     |      |      |      |      |     |      |      |     |      |       |       |     |      |       |      |      |
| Memory                            | 26  | 26           | 25  | 24   | 23   | 5    | 25   | 24  | 20   | 7    | 21  | 16   | 0     | 5     | 25  | 15   | 20    | 13   | 18   |
| Attention                         | 18  | 18           | 18  | 14   | 15   | 8    | 14   | 17  | 18   | 13   | 18  | 13   | 1     | 4     | 17  | 14   | 12    | 13   | 17   |
| Fluency                           | 14  | 8            | 12  | 2    | 5    | 1    | 11   | 9   | 12   | 4    | 9   | 7    | 0     | 3     | 12  | 1    | 1     | 10   | 9    |
| Language                          | 26  | 25           | 24  | 21   | 22   | 13   | 24   | 25  | 24   | 8    | 26  | 18   | 7     | 13    | 25  | 21   | 16    | 10   | 23   |
| Visuospatial                      | 16  | 16           | 16  | 13   | 12   | 9    | 15   | 15  | 16   | 11   | 16  | 15   | 11    | 6     | 15  | 9    | 12    | 14   | 14   |
| Total                             | 100 | 93           | 95  | 74#  | 77#  | 36#  | 89   | 90  | 90   | 43#  | 90  | 69#  | 19#   | 31#   | 94  | 60#  | 61#   | 60#  | 81#  |
| <b>Cognition (WAIS-IV)</b>        |     |              |     |      |      |      |      |     |      |      |     |      |       |       |     |      |       |      |      |
| Forward Digit Span                | 20  | 7            | 13  | 9    | 8    | 6    | 8    | 9   | 10   | 16   | 8   | 3*   | 1*    | 4     | 9   | 5    | 6     | 8    | 8    |
| Backward Digit Span               | 20  | 8            | 11  | 6    | 8    | 5    | 10   | 10  | 10   | 16   | 6   | 6    | 1*    | 2*    | 11  | 3*   | 5     | 7    | 11   |
| Coding                            | 20  | NA           | NA  | NA   | NA   | NA   | 16   | NA  | 13   | NA   | NA  | 2*   | NA    | 1*    | 14  | 7    | 4     | 7    | 10   |
| Matrix Reasoning                  | 20  | 15           | 12  | 7    | 9    | 8    | 10   | 12  | 14   | 11   | 14  | 11   | 3*    | 2*    | 13  | 6    | 7     | 14   | 5    |

\* >2SD from the mean for healthy controls

\*\* <cut-off point for healthy controls on the CAT

# Scores below 88 are indicative of dementia as per Hsieh, Schubert, Hoon, Mioshi and Hodges (2013)

a Normative data are derived from Savage et al. (2013)

b Normative data are derived from Leyton et al. (2014)

c Normative data are derived from Swinburn, Porter and Howard (2004)

d Normative data are derived from Wechsler (2008). Standard scores have a mean of 10 and SD of 3.

NA: The Coding subtest was not administered to 9 participants due to inability to administer this test via telehealth. Other NA cells are due to the test being discontinued or not administered due to significant participant distress.

Note: Across all tests, higher numbers indicate better performance. All scores are raw scores except for subtest from the WAIS, which are scaled scores. For scaled scores, scores range from 1-20 where the mean=5 and SD=3.
