# Supplementary material for: Quality of Life Ratings and Proxy Bias in Primary Progressive Aphasia: Two Sides to the Story?
Source: PubMed Central journal article supplement — Am J Alzheimers Dis Other Demen. 2023 May 29;38:15333175231177668. doi: 10.1177/15333175231177668 (PMC10623902; doi:10.1177/15333175231177668), 2023-05-29
Supplement: sj-pdf-3-aja-10.1177_15333175231177668.pdf [file sj-pdf-3-aja-10.1177_15333175231177668.pdf]

| Variable        | 1. PPA - part diff | 2. SR QOL        | 3. PR QOL       | 4. PPA Age      | 5. Part Age    | 6. Gend PPA     | 7. Gend Proxy | 8. PPA yrs edu | 9. Part yrs edu | 10. Relat' ship | 11. Time since ons | 12. GDS      | 13. CBI          | 14. Syd Bat       | 15. ACE |
|-----------------|--------------------|------------------|-----------------|-----------------|----------------|-----------------|---------------|----------------|-----------------|-----------------|--------------------|--------------|------------------|-------------------|---------|
| 2. SR QOL       | Rho<br>p           | —<br>—           |                 |                 |                |                 |               |                |                 |                 |                    |              |                  |                   |         |
| 3. PR QOL       | Rho<br>p           | 0.21<br>0.41     | —<br>—          |                 |                |                 |               |                |                 |                 |                    |              |                  |                   |         |
| 4. PPA Age      | Rho<br>p           | -0.27<br>0.28    | 0.19<br>0.45    | —<br>—          |                |                 |               |                |                 |                 |                    |              |                  |                   |         |
| 5. Part Age     | Rho<br>p           | -0.42<br>0.09    | 0.25<br>0.32    | 0.63 **<br>0.01 | —<br>—         |                 |               |                |                 |                 |                    |              |                  |                   |         |
| 6. Gender PPA   | Rho<br>p           | -0.53 *<br>0.02  | 0.22<br>0.39    | 0.31<br>0.21    | 0.32<br>0.2    | —<br>—          |               |                |                 |                 |                    |              |                  |                   |         |
| 7. Gender Proxy | Rho<br>p           | -0.64 **<br>0.14 | 0.36<br>0.35    | 0.01<br>0.96    | -0.13<br>0.61  | -0.47 *<br>0.05 | —<br>—        |                |                 |                 |                    |              |                  |                   |         |
| 8. PPA yrs edu  | Rho<br>p           | -0.46<br>0.02    | 0.19<br>0.45    | 0.33<br>0.19    | 0.15<br>0.56   | 0.09<br>0.72    | -0.03<br>0.92 | —<br>—         |                 |                 |                    |              |                  |                   |         |
| 9. Part yrs edu | Rho<br>p           | 0.28<br>0.3      | 0.43<br>0.09    | -0.4<br>0.12    | -0.43<br>0.09  | -0.25<br>0.35   | 0.47<br>0.06  | 0.16<br>0.56   | —<br>—          |                 |                    |              |                  |                   |         |
| 10. Relat-ship  | Rho<br>p           | -0.45<br>0.08    | 0.12<br>0.65    | 0.08<br>0.76    | 0.58 *<br>0.02 | 0.56 *<br>0.02  | -0.3<br>0.26  | -0.27<br>0.31  | -0.34<br>0.21   | —<br>—          |                    |              |                  |                   |         |
| 11. Time since  | Rho<br>p           | -0.46<br>0.06    | -0.58 *<br>0.01 | 0.09<br>0.73    | 0.14<br>0.57   | 0.53 *<br>0.03  | -0.31<br>0.21 | 0.35<br>0.16   | -0.24<br>0.37   | 0.41<br>0.11    | —<br>—             |              |                  |                   |         |
| 12. GDS         | Rho<br>p           | -0.43<br>0.09    | -0.4<br>0.11    | 0.35<br>0.17    | 0.18<br>0.5    | 0.23<br>0.38    | -0.09<br>0.74 | 0.49 *<br>0.05 | -0.48<br>0.07   | 0.05<br>0.87    | 0.15<br>0.56       | —<br>—       |                  |                   |         |
| 13. CBI         | Rho<br>p           | 0.19<br>0.46     | -0.25<br>0.32   | -0.09<br>0.73   | -0.21<br>0.41  | 0.03<br>0.89    | 0.03<br>0.92  | -0.39<br>0.11  | -0.29<br>0.28   | 0.19<br>0.49    | -0.04<br>0.88      | 0.01<br>0.98 | —<br>—           |                   |         |
| 14. Syd Bat     | Rho<br>p           | -0.24<br>0.34    | 0.15<br>0.55    | 0.57 *<br>0.01  | 0.08<br>0.74   | -0.25<br>0.32   | -0.08<br>0.76 | 0.57 *<br>0.01 | 0.34<br>0.19    | -0.45<br>0.08   | -0.2<br>0.43       | 0.17<br>0.51 | -0.61 **<br>0.01 | —<br>—            |         |
| 15. ACE         | Rho<br>p           | -0.39<br>0.12    | -0.01<br>0.97   | 0.52 *<br>0.03  | 0.22<br>0.39   | 0.01<br>0.96    | -0.14<br>0.57 | 0.65 **<br>0   | 0.26<br>0.34    | -0.33<br>0.21   | -0.02<br>0.94      | 0.35<br>0.17 | -0.68 **<br>0    | 0.86 ***<br><.001 | —<br>—  |

\* p < .05, \*\* p < .01, \*\*\* p < .001
